# Supplementary material
Source: MDPI journal article supplement (https://www.mdpi.com/2073-445X/5/2/11)
Supplement: s1 [file s1]

# Supplementary Materials: Historical Changes of Land Tenure and Land Use Rights in a Local Community: A Case Study in Lao PDR. *Land* 2016, 5, 11.

Saykham Boutthavong, Kimihiko Hyakumura, Makoto Ehara and Takahiro Fujiwara

The way of individual households obtained land can be classified in four approaches, as listed here.

**(1) Claim (*jab jong*):** This refers to the land occupied by households. After claiming, the land boundary was controlled, while the household practiced agricultural activities. The household land boundary was marked by traditional or natural symbols. Some households built fences to surround their claimed land parcels and acknowledge neighboring households' land. Land that was claimed on a first-come, first-served basis typically had no registration process or documentation; households did not need to buy the claimed area. In the case of paddy fields, households typically claimed the areas along the stream or wetland area first and then converted them to paddy field.

**(2) Allocation:** A household obtained land through an allocation process. The migrant household or household lacking agricultural area proposed their need for cultivation land to the village organization. After that, both the village's organization and/or district authority allocated unoccupied area to the household.

**(3) Inheritance:** A household obtained land through the inheritance among household members or relatives, with or without documents (for instance, land inherited from parents to sons or daughters). Land parcels may be divided for inheritance.

**(4) Transfer:** Title was transferred to a household through the buying and selling process, either informally or formally, between villagers in the same village or outsiders. New landholders may have bought the land with cash, or payment could have been by an exchange of high value assets such as gold, a truck, a car, or a tractor. The cost of transferring land varies for different land parcels, depending on location of the land, accessibility, land use type, land use condition, and negotiation between buyer and seller.

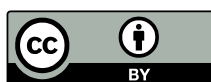

© 2016 by the authors; licensee MDPI, Basel, Switzerland. This article is an open access article distributed under the terms and conditions of the Creative Commons by Attribution (CC-BY) license (<http://creativecommons.org/licenses/by/4.0/>).
